# Supplementary material
Source: publisher figshare collection journal article supplement (https://frontiersin.figshare.com/ndownloader/files/13663415)
Supplement: Supplementary file [file 13663415]

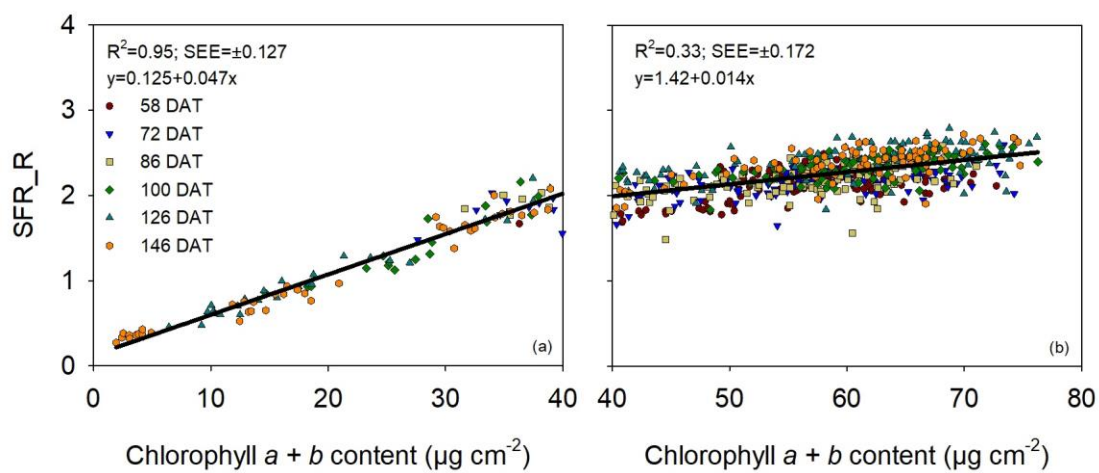

Figure S3. Liner regression between chlorophyll *a* + *b* content, in the range of 0 to 40 and of 40 to 80  $\mu\text{g cm}^{-2}$ , and the Simple Fluorescence Ratio under red excitation (SFR\_R), measured with the Multiplex sensor. Coefficient of determination ( $R^2$ ), standard error of the estimate ( $\pm\text{SEE}$ ) and equation are shown.
